# Supplementary material for: Risk and Resilience Factors for Youth Homelessness in Western Countries: A Systematic Review
Source: Atypon-hosted journal article supplement (doi:10.1176/appi.ps.202000133), 2021-07-29
Supplement: appi.ps.202000133.ds001.pdf [file appi.ps.202000133.ds001.pdf]

## Supplementary Materials

Records identified through database searches (n = 1154)

Records identified through reference searches, or expert suggestion (n = 3)

Duplicates removed (n = 492)

Records screened based on title and abstract (n = 665)

Records excluded based on title and abstract (n = 627), primarily due to lack of a comparison group, older age group, or not examining risk or resilience for homelessness.

Records screened based on full-text (n = 38)

Records excluded based on full-text (n = 22), primarily due to lack of a comparison group or examining factors subsequent to homelessness.

Records included in review (n = 16)

**Figure 1.** Flowchart of systematic review of risk and resilience of studies of youth experiencing homelessness.

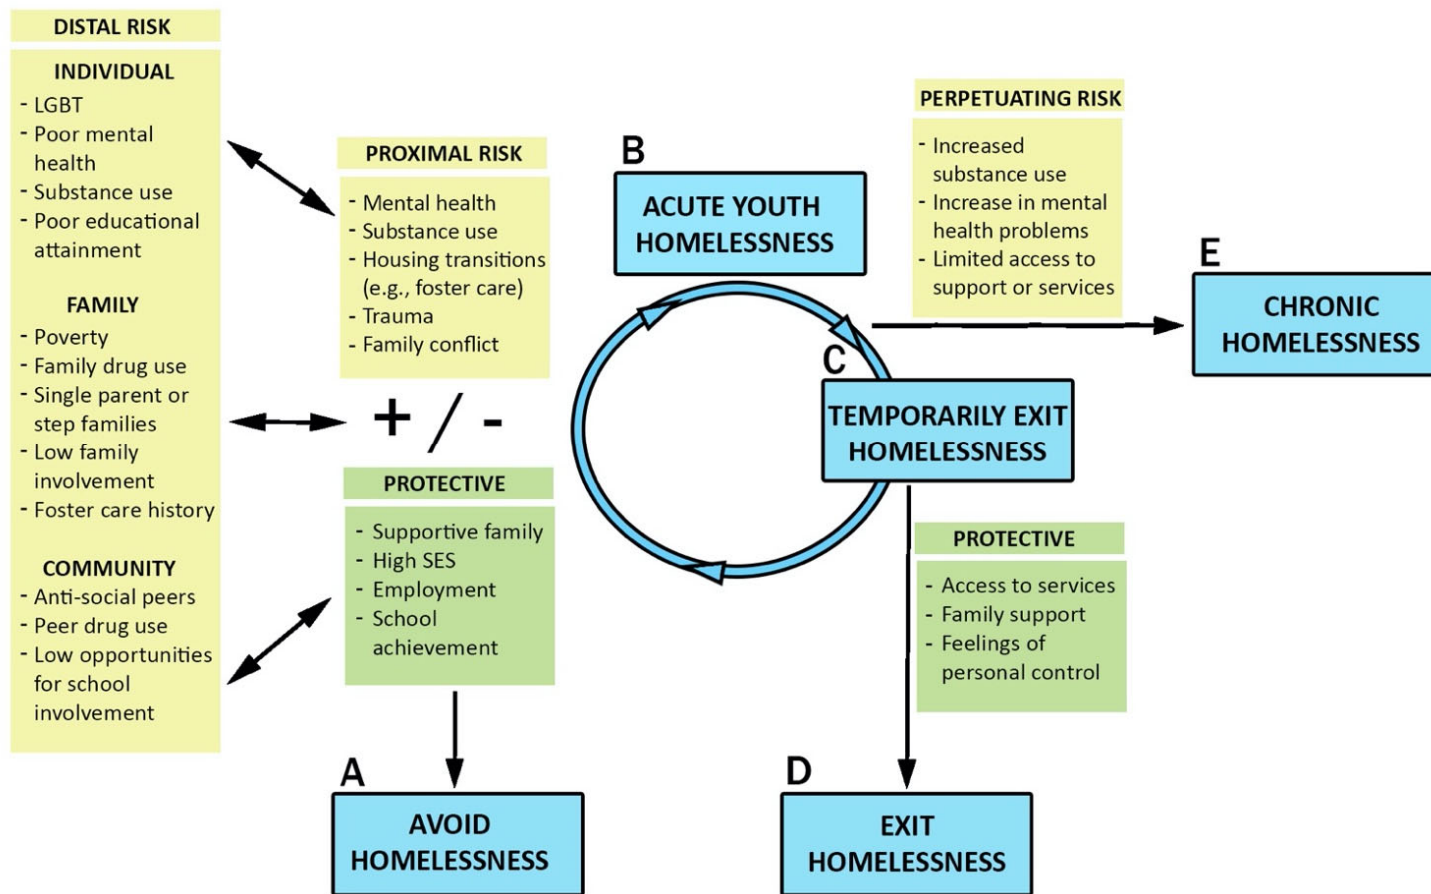

**Figure 2.** Provisional developmental model of youth homelessness. As described in Tambe and Rice [44] homelessness risk for young people is cyclical. This model summarizes current knowledge of risk (represented in yellow) and protective (represented in green) factors that contribute to A) Avoiding homelessness altogether, B) Developing an initial episode of homelessness, C) Temporarily exiting homelessness, D) Permanently exiting homelessness, and E) Developing chronic homelessness.

## Supplementary Material 1: Homelessness Outreach and Monitoring of Environments (HOME)

HOME is a preliminary screening system for risk for homelessness in young people, and is designed to assist services with identifying times of heightened risk of homelessness, and responding to this risk. HOME is also designed to be used in research and we acknowledge that further information on resilience factors as well as family and system level factors will be important in improving this system.

HOME involves flagging young people at higher risk for homelessness (those who report a history of common distal risk factors) for key proximal homelessness risk factors, in order to initiate support for these young people *before* they lose housing or become homeless. This system aims to improve upon common current approaches of enquiring about homelessness, by providing a clear group of risk factors to consider, and indicating some appropriate ways to respond to this risk. This addresses several key factors identified by WHO in a comprehensive public health prevention strategies including identification and monitoring of risk factors, and prevention strategies at the vulnerable group level. It also creates an optimal opportunity for future research providing a clear approach to follow and evaluate. HOME can be used flexibly depending on the service it is being implemented within. A survey is included within this supplement as a suggestion of how services could assess for this information.

It involves:

1. Identifying youth at risk using 7 key factors. Possible tools for assessing these factors are also included. Literature suggests youth with more than one factor are at particular risk [41].
  - a. Economic background: Youth who live in low SES neighborhood, or in a family who are under-resourced (ie. Receiving public benefits, on Medi-caid) – Can be measured by asking about benefits, income or parental self-report on validated measures [47]
  - b. Trauma: Youth who have a history of trauma, including systemic racial trauma – can be identified using common ACES screening tools [48]
  - c. Academic history: Youth with a history of poor achievement, problem behaviors or difficulties at school – can be measured using the Child Behavior Checklist [49]
  - d. Housing history: youth who experienced homelessness as a child or ran away from home – Can be measured by self-report or interview using timeline follow-back techniques [50]
  - e. Identity: youth identifying as LGBTIQ+, particularly if this has caused tension in their family – can be measured by self-report.
  - f. Family environment: Youth from a single parent family, family support or who have been in the foster care system – can be measured by self-report family quality of life [51]
  - g. Justice history: youth whose families are involved with the justice system, or who have been involved themselves – can be measured by self-report.

The distal risk factor information can be collected in a variety of ways. We suggest incorporating the information in standard clinical assessment, giving questions as a survey for new service users, or flagging the information on health records. For young people with two or more of these distal factors, HOME suggests providing housing and financial resources upon treatment initiation, as a preventative step, and then ongoing

monitoring for any proximal risk factors.

2. Monitor youth for 5 key environmental changes that increase risk
  - a. Family conflict
  - b. Drug or substance use: In particular exacerbations in use
  - c. Exacerbation of mental illness symptoms
  - d. Job: becoming unemployed or at a reduced income (or for family if individual is a child)
  - e. Changes in environment: in particular leaving a care environment such as foster care, jail or psychiatric care

Again, environmental changes can be monitored in a variety of ways depending on the resources within the service. Some effective approaches could include clinician monthly monitoring, phone check ins, or quarterly surveys.

3. For youth at risk experiencing these changes, the following are possible intervention responses:

Following identification of youth at high risk for homelessness, HOME suggests close monitoring via intensive case management. Further, HOME suggests the following additional strategies: 1) building a supportive relationship in the clinical setting where the young person feels comfortable sharing the difficulties they are having, 2) Referring the young person to a talk-therapist may help if they do not currently have someone they trust to speak to outside of the family, 3) Understanding what protective factors these youth have – and in a clinical setting building on these where possible. For example, encouraging young people to reach out to their extended family, or other social supports if their family is not a stable option.

Supplementary Table 1 – Summary of risk factors included across studies

|                                                          | [13]<br>Rosa<br>rio et<br>al.,<br>2012 | [14]<br>Dwo<br>rsky<br>et<br>al.,<br>2013 | [15]<br>Shah<br>et<br>al.,<br>2017 | [16]<br>Fowl<br>er et<br>al.,<br>2009 | [17]<br>Dwo<br>rsky<br>&<br>Cour<br>tney,<br>2009 | (17)<br>Prin<br>ce et<br>al.,<br>2019 | [19]<br>Rob<br>ert et<br>al.,<br>2005 | [20]<br>Emb<br>ry et<br>al.,<br>2000 | [1]<br>Szna<br>jder-<br>Murr<br>ay et<br>al.,<br>2015 | [21]<br>Tyle<br>r et<br>al.,<br>2011 | [22]<br>Van<br>den<br>Bree<br>et<br>al.,<br>2009 | [23]<br>Tyle<br>r &<br>Bers<br>ani,<br>2008 | [24]<br>Shelt<br>on et<br>al.,<br>2009 | [2]<br>Mort<br>on et<br>al.,<br>2018 | [26]<br>Bear<br>sley-<br>Smit<br>h et<br>al.,<br>2008 | [25]<br>Cast<br>años<br>-<br>Cerv<br>antes<br>et<br>al.,<br>2018 |
|----------------------------------------------------------|----------------------------------------|-------------------------------------------|------------------------------------|---------------------------------------|---------------------------------------------------|---------------------------------------|---------------------------------------|--------------------------------------|-------------------------------------------------------|--------------------------------------|--------------------------------------------------|---------------------------------------------|----------------------------------------|--------------------------------------|-------------------------------------------------------|------------------------------------------------------------------|
| <b>Demographics</b>                                      | O                                      | +/- <sup>1</sup>                          | O                                  | O                                     | X                                                 | X                                     | O                                     | X                                    | X                                                     | +/- <sup>2</sup>                     | X                                                | -                                           | -                                      | +/-                                  | X                                                     | O                                                                |
| <b>LGBTIQ+</b>                                           | -                                      | X                                         | O                                  | O                                     | O                                                 | O                                     | O                                     | O                                    | O                                                     | O                                    | O                                                | O                                           | O                                      | -                                    | O                                                     | O                                                                |
| <b>Racial/Ethnic<br/>Minority</b>                        | O                                      | X                                         | - <sup>3</sup>                     | -                                     | X                                                 | -                                     | O                                     | X                                    | + <sup>4</sup>                                        | X                                    | X                                                | +                                           | -/+                                    | -                                    | O                                                     | O                                                                |
| <b>Justice system<br/>involvement</b>                    | O                                      | -                                         | -                                  | O                                     | X                                                 | -                                     | O                                     | X                                    | X                                                     | O                                    | X                                                | -                                           | X                                      | O                                    | O                                                     | O                                                                |
| <b>Education-<br/>related<br/>protective<br/>factors</b> | O                                      | X                                         | +                                  | O                                     | X                                                 | O                                     | O                                     | O                                    | +                                                     | O                                    | O                                                | O                                           | +                                      | O                                    | +                                                     | O                                                                |
| <b>Employment<br/>factors</b>                            | O                                      | O                                         | O                                  | O                                     | X                                                 | O                                     | O                                     | O                                    | O                                                     | O                                    | O                                                | +                                           | +                                      | O                                    | O                                                     | O                                                                |
| <b>Economic<br/>difficulty</b>                           | O                                      | X                                         | O                                  | O                                     | O                                                 | X                                     | O                                     | O                                    | -                                                     | O                                    | O                                                | O                                           | -                                      | -                                    | O                                                     | O                                                                |
| <b>Foster care<br/>related risk<br/>factors</b>          | O                                      | -                                         | -                                  | -                                     | X                                                 | X                                     | -                                     | -                                    | O                                                     | O                                    | O                                                | O                                           | -                                      | O                                    | O                                                     | O                                                                |
| <b>Remained in<br/>foster care<br/>until age 19</b>      | O                                      | O                                         | O                                  | O                                     | O                                                 | +                                     | O                                     | O                                    | O                                                     | O                                    | O                                                | O                                           | O                                      | O                                    | O                                                     | O                                                                |

<sup>1</sup> Male is a risk factor.

<sup>2</sup> Female is a protective factor.

<sup>3</sup> Only African American was a risk factor in this sample.

<sup>4</sup> Hispanic ethnicity was a protective factor.

|                                            |   |   |   |   |   |   |     |                  |   |   |   |     |     |   |   |   |   |
|--------------------------------------------|---|---|---|---|---|---|-----|------------------|---|---|---|-----|-----|---|---|---|---|
| <b>School issues</b>                       | O | X | - | O | O | - | X   | X                | X | X | - | -/+ | X   | - | - | O |   |
| <b>Trauma</b>                              | X | - | O | O | X | O | -   | -                | O | O | - | -   | -   | O | X | O |   |
| <b>Mental health issues</b>                | O | - | X | O | X | O | -/X | +/- <sup>5</sup> | O | X | X | O   | -   | O | X | - |   |
| <b>Substance use</b>                       | - | X | O | O | X | - | X   | -                | - | O | X | +/- | +/- | O | O | O |   |
| <b>Good family relationships</b>           | O | X | O | O | + | X | O   | O                | O | O | + | X   | O   | O | + | O |   |
| <b>Authoritative/harsh parenting</b>       | O | O | O | O | O | O | X   | O                | - | O | O | X   | O   | O | O | O |   |
| <b>Environmental risk</b>                  | O | O | - | O | O | - | O   | O                | X | X | O | X   | O   | O | O | O |   |
| <b>Antisocial peers</b>                    | O | O | O | O | O | O | O   | O                | O | O | O | X   | O   | O | - | O |   |
| <b>Does not live with relatives</b>        | O | O | O | O | - | X | O   | O                | - | O | O | O   | O   | O | O | O |   |
| <b>Family conflict</b>                     | O | O | O | O | O | O | -   | O                | O | - | O | O   | X   | O | - | O |   |
| <b>Family risk factors</b>                 | O | O | O | O | O | X | O   | O                | - | X | O | O   | -   | - | - | O |   |
| <b>Family protective factors</b>           | O | + | + | O | X | X | O   | O                | X | x | O | +   | O   | O | O | O |   |
| <b>Adopted</b>                             | O | O | O | O | O | O | O   | O                | O | O | O | O   | O   | - | O | O | O |
| <b>Social support</b>                      | O | X | O | O | X | + | O   | O                | O | O | O | O   | O   | O | O | O | O |
| <b>Housing instability</b>                 | O | - | - | O | - | - | O   | -                | - | - | O | O   | -   | O | O | O |   |
| <b>Never ran away while in foster care</b> | O | O | O | O | X | O | O   | O                | O | O | O | O   | O   | O | O | O |   |

---

<sup>5</sup> Thought disorder diagnosis was a protective factor.

|                                              |   |   |   |   |   |   |   |   |   |   |   |   |   |   |   |   |   |
|----------------------------------------------|---|---|---|---|---|---|---|---|---|---|---|---|---|---|---|---|---|
| <b>Individual protective characteristics</b> | O | O | O | O | O | O | O | O | O | O | O | O | O | O | O | X | + |
| <b>Developmental risk factors</b>            | - | O | O | O | O | O | O | O | O | O | O | O | O | O | O | O | O |

**Supplementary table 1: Summary of risk factors included across studies.** The table summarizes all risk factors examined across each study included in this review, and whether each factor was a significant risk (-) or resilience (+) factor, whether it was examined but not found to be significant in a particular study (X), or if it was not included in the study at all (O). Since there were many specific factors examined, factors were grouped into categories, with details of each category included in Supplementary Table 2.

Supplementary Table 2: Sub-groupings for each risk and resilience factor

|                                                                                                                                                                                                            |                                                                               |                                                                  |
|------------------------------------------------------------------------------------------------------------------------------------------------------------------------------------------------------------|-------------------------------------------------------------------------------|------------------------------------------------------------------|
| <b>Demographics</b>                                                                                                                                                                                        | <b>Foster Care related risk factors</b>                                       | Suicidal ideation                                                |
| Age, Older age at baseline study                                                                                                                                                                           | Number of housing services received                                           | Prescribed antidepressants (past 12 months)                      |
| Military                                                                                                                                                                                                   | Re-entered foster care after being returned home                              | Behavioral disorders                                             |
| Rural vs Urban                                                                                                                                                                                             | More placement transitions while in foster care                               | Somatic symptoms, Depressive symptoms                            |
| Sex                                                                                                                                                                                                        | Younger at exit from foster care                                              | Depressive symptomatology                                        |
| <b>LGBT</b>                                                                                                                                                                                                | Less likely transition out of foster care after independent living placements | Externalizing behavior scores in the clinical range              |
| <b>Racial/Ethnic Minority</b>                                                                                                                                                                              | Less likely to have left foster care after restrictive placements             | <b>Substance use</b>                                             |
| <b>Justice system involvement</b>                                                                                                                                                                          | Prior foster care episode                                                     | Substance use                                                    |
| Incarceration                                                                                                                                                                                              | Prior placement in substitute environment outside the house                   | Early alcohol onset                                              |
| Delinquency/legal problems                                                                                                                                                                                 | <b>Remained in foster care at age 19</b>                                      | Substance abuse referral                                         |
| Juvenile rehab service/court                                                                                                                                                                               | <b>School issues</b>                                                          | Binge drinking and substance use                                 |
| Ever had juvenile justice involvement                                                                                                                                                                      | School issues                                                                 | <b>Good family relationships</b>                                 |
| Perpetration of violent acts                                                                                                                                                                               | Less than High school Ed                                                      | Family involvement                                               |
| Criminal behavior, Perpetrator of violence, Member of a named gang, Arrested or taken into custody by police, Convicted or pleaded guilty in juvenile court, Convicted or pleaded guilty in an adult court | Learning disability                                                           | Close to parent or grandparent (foster youth)                    |
| <b>Education related protective factors</b>                                                                                                                                                                | Early problem behavior/history of behavior issues/child behavior problem      | Family relationship quality                                      |
| High GPA                                                                                                                                                                                                   | School adjustment problems, school dissociation                               | Close to out of home caregiver                                   |
| Grade when respondent left school                                                                                                                                                                          | Dropping out of school                                                        | Temporary home visit (foster youth)                              |
| Left foster care with HS or GED                                                                                                                                                                            | School suspension                                                             | Warmth and support from parents                                  |
| Ever received school services                                                                                                                                                                              | School fight                                                                  | Rewards for family involvement                                   |
| Opportunity for school involvement                                                                                                                                                                         | Expelled from school                                                          | Very close to at least one adult family member                   |
| Completing some college                                                                                                                                                                                    | Low school commitment                                                         | <b>Authoritative/Harsh parenting</b>                             |
| <b>Employment Factors</b>                                                                                                                                                                                  | <b>Trauma</b>                                                                 | Parenting-harsh punishment/excessive discipline and punishment   |
| Employed                                                                                                                                                                                                   | Trauma                                                                        | Authoritative father                                             |
| Ever had a job                                                                                                                                                                                             | Physical abuse; high level of parental violence (abuse)                       | Authoritative mother                                             |
| Higher SES                                                                                                                                                                                                 | Sexual abuse                                                                  | <b>Environmental risk</b>                                        |
| <b>Economic difficulty</b>                                                                                                                                                                                 | Neglect                                                                       | Youth is a parent                                                |
| Economic difficulty in the past 12 months                                                                                                                                                                  | Neighborhood victimization                                                    | Prior medical injury                                             |
| Currently receiving welfare benefits                                                                                                                                                                       | Victimization/peer victimization/ victim of violence                          | Environmental risk                                               |
| Duration of welfare assistance before age 18                                                                                                                                                               | <b>Mental health issues</b>                                                   | Government spending on housing supports                          |
| Low income                                                                                                                                                                                                 | Mental Health Issues                                                          | Percentage of housing burdened renters                           |
| Parent's work limitation due to poor health                                                                                                                                                                | History of Psych                                                              | <b>Antisocial peers</b>                                          |
| Unemployed                                                                                                                                                                                                 | Hospitalizations                                                              | Deviant peers                                                    |
| Number of financial services                                                                                                                                                                               | Negative emotions                                                             | <b>Does not live with relatives</b>                              |
|                                                                                                                                                                                                            | Low self-esteem                                                               | Does not live with bio family/ Placed in nonrelative foster home |
|                                                                                                                                                                                                            | Dysfunctional ER strategies                                                   |                                                                  |
|                                                                                                                                                                                                            | Gambling                                                                      |                                                                  |



Placed in a group care setting

**Family conflict**

Pathogenic family dynamic  
Social services investigation of fam.  
Family conflict/instability  
Poor youth/parent relationship

**Family risk factors**

Bio Father incarcerated  
Youth's parent was teen mom  
Unmarried/single parent or re-partnered family  
Poor family management  
Parental attitudes favorable to drug use  
Family drug use/caregiver substance abuse

**Family protective factors**

Mother's education  
Parent's general health  
Family structure (living with mom and dad)  
Monitoring style parenting  
Placed in relative foster home  
Opportunities for family involvement

**Adopted**

**Social support**

Connection to an adult  
Number of wellbeing services

**Developmental risk factors**

Age of first sexual activity  
Age of puberty

**Housing instability**

Prior Homelessness  
History of ever running away  
Ran away while in foster care more than once  
Ordered out of home by parents

**Never ran away while in foster care**

**Individual protective characteristics**

Assertiveness  
Subjective Well-being  
Positive emotion

Supplementary Table 3: Risk of bias assessments

| Article                         | <b>Selection Bias</b><br>Homelessness measured using validated measures or self-report and groups treated the same = low bias<br><br>Homelessness assumed by reviewer or unstructured clinical interview and/or groups selected differently = high bias | <b>Detection Bias</b><br>Were appropriate confounds eg gender, age, SES, income etc considered? = low bias<br><br>Little to no consideration of confounds = high bias |
|---------------------------------|---------------------------------------------------------------------------------------------------------------------------------------------------------------------------------------------------------------------------------------------------------|-----------------------------------------------------------------------------------------------------------------------------------------------------------------------|
| Prince et al 2019               | Low                                                                                                                                                                                                                                                     | Low                                                                                                                                                                   |
| Castaños-Cervantes et al., 2018 | Low                                                                                                                                                                                                                                                     | High                                                                                                                                                                  |
| Morton et al., 2018             | Low                                                                                                                                                                                                                                                     | Low                                                                                                                                                                   |
| Rosario et al., 2012            | Low                                                                                                                                                                                                                                                     | Low                                                                                                                                                                   |
| Shah et al., 2017               | High                                                                                                                                                                                                                                                    | Low                                                                                                                                                                   |
| Sznajder-Murray et al., 2015    | Low                                                                                                                                                                                                                                                     | Low                                                                                                                                                                   |
| Dworsky et al., 2013            | Low                                                                                                                                                                                                                                                     | Low                                                                                                                                                                   |
| Embry et al., 2000              | Low                                                                                                                                                                                                                                                     | Low                                                                                                                                                                   |
| Tyler et al., 2011              | Low                                                                                                                                                                                                                                                     | Low                                                                                                                                                                   |
| Van den Bree et al., 2009       | Low                                                                                                                                                                                                                                                     | Low                                                                                                                                                                   |
| Bearsley-Smith et al., 2008     | High                                                                                                                                                                                                                                                    | Low                                                                                                                                                                   |
| Robert et al., 2005             | High                                                                                                                                                                                                                                                    | Low                                                                                                                                                                   |
| Tyler & Bersani, 2008           | Low                                                                                                                                                                                                                                                     | Low                                                                                                                                                                   |
| Shelton et al., 2009            | Low                                                                                                                                                                                                                                                     | Low                                                                                                                                                                   |
| Fowler et al., 2009             | Low                                                                                                                                                                                                                                                     | Low                                                                                                                                                                   |
| Dworsky & Courtney, 2009        | Low                                                                                                                                                                                                                                                     | Low                                                                                                                                                                   |
